# Supplementary material
Source: publisher site journal article supplement (https://www.dovepress.com/article/320130)
Supplement: Supplementary file 1 [file get_supplementary_file.php]

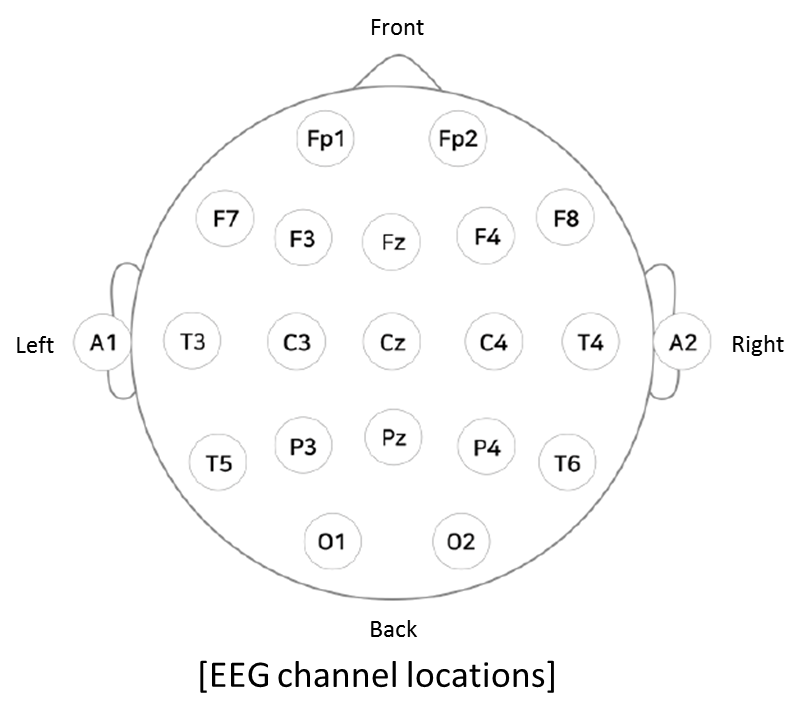


**Supplementary figure 1** 19 Scalp Electrodes Positioned based on the International 10-20 System

| Domains | Score | % | Subtests | Maximum points |
| --- | --- | --- | --- | --- |
| Attention | 17 | 6 | Digit span forward  Digit span backward | 9  8 |
| Language and  related function | 27 | 9 | Short form of K-BNT (A form)  Calculation  (3 items each for addition,  Subtraction, multiplication, division) | 15  12 |
| Visuospatial function | 36 | 12 | RCFT copy | 36 |
| Memory | 150 | 50 | Orientation  SVLT free/delayed recalls  SVLT recognition  RCFT immediate/delayed recalls  RCFT recognition | 6 |
| Frontal/Executive function | 70 | 23 | Motor impersisitence  Contrasting program  Go-no-go test  Fist-edge-palm  Luria loop  Category word generation (animal)  Phonemic word generation  Stroop test-color reading | 3  3  3  3  3  20  15  20 |
| GCF score | 30 | 100 |  |  |

**Supplementary table 1** Components and Scores of SNSB

**Abbreviations:** K-BNT, Korean-Boston naming test; RCFT, Rey-complex figure test; SVLT, Seoul verbal learning test; GCF, global cognitive function.
